# Supplementary material for: Cobalt ion-enhanced photochemical vapor generation in a mixed acid medium for sensitive detection of tellurium(iv) by atomic fluorescence spectrometry
Source: Royal Society of Chemistry journal article supplement (doi:10.1039/d0ja00076k), 2020-01-01
Supplement: d0ja00076k1.pdf [file d0ja00076k1.pdf]

## Electronic Supplementary Information

### **Cobalt ion-enhanced photochemical vapor generation of tellurium (IV) in mixed acid medium for its sensitive detection by atomic fluorescence spectrometry**

Wen Zeng,<sup>a</sup> Jing Hu,<sup>a</sup> Hanjiao Chen,<sup>a</sup> Zhirong Zou,<sup>a</sup> Xiandeng Hou<sup>a,b</sup> and Xiaoming Jiang<sup>\*a</sup>

<sup>a</sup> Analytical & Testing Center, Sichuan University, Chengdu, Sichuan 610064, China.

<sup>b</sup> College of Chemistry, Sichuan University, Chengdu, Sichuan 610064, China.

\* Corresponding author's E-mail: [jiangxm@scu.edu.cn](mailto:jiangxm@scu.edu.cn).

#### **Table of contents:**

1. EPR characterization
2. Optimization of PVG

## 1. EPR characterization

Aliquots of 1 mL reaction solution including 10  $\mu\text{L}$  5,5-dimethyl-1-pyrroline *N*-oxide (DMPO, 100 mM) were pumped into the PVG reactor for UV irradiation and generation of volatile species of Te. Radical species generated during the PVG process were captured by DMPO to form DMPO-free radical adducts. Subsequently, a small amount of reaction solution (about 5  $\mu\text{L}$ ) was collected with a capillary (internal diameter, 500  $\mu\text{m}$ ) for EPR (EMXplus X-band EPR spectrometer, Bruker, Germany) characterization directly. The instrumental parameters of EPR characterization were summarized in Table S1; and the hyperfine constants of several free radicals were listed in Table S2.

Table S1. Instrumental parameters of continuous wave EPR for characterization.

| Parameter            | Value      |
|----------------------|------------|
| Microwave Frequency  | 9.84 GHz   |
| Centre Field         | 3511 Gauss |
| Power                | 2.00 mW    |
| Modulation Amplitude | 1.00 Gauss |
| Modulation Frequency | 100 KHz    |

Table S2. Hyperfine constants of free radicals.

| Free radicals          | Hyperfine constants                                                    |
|------------------------|------------------------------------------------------------------------|
| $\bullet\text{CO}_2^-$ | $a_{\text{N}} = 15.3 \text{ G}$ , $a_{\text{H}\beta} = 18.6 \text{ G}$ |
| $\bullet\text{CH}_3$   | $a_{\text{N}} = 15.5 \text{ G}$ , $a_{\text{H}\beta} = 22.5 \text{ G}$ |
| Oxidized DMPO          | $a_{\text{N}} = 15.1 \text{ G}$                                        |

## 2. Optimization of PVG

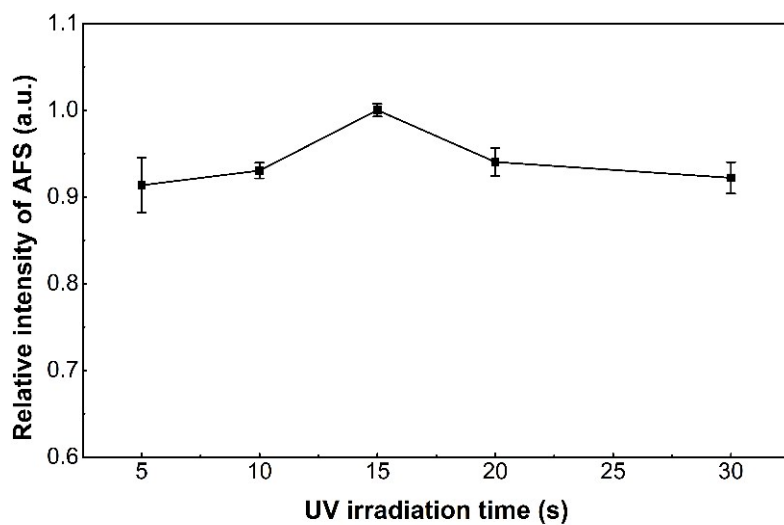

**Fig. S1** Influence of UV irradiation time.

Experimental details: Te(IV), 50  $\mu\text{g L}^{-1}$ ; and  $\text{Co}^{2+}$ , 1  $\text{mg L}^{-1}$ .

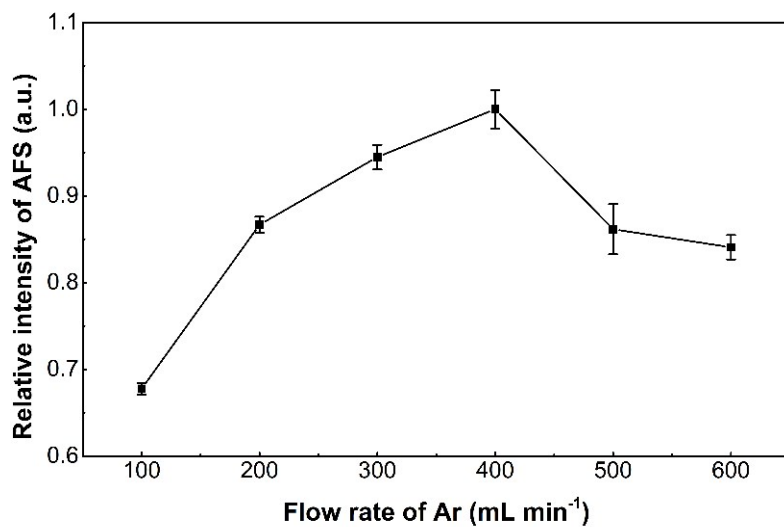

**Fig. S2** Influence of Ar flow rate.

Experimental details: Te(IV), 50  $\mu\text{g L}^{-1}$ ; and  $\text{Co}^{2+}$ , 1  $\text{mg L}^{-1}$ .

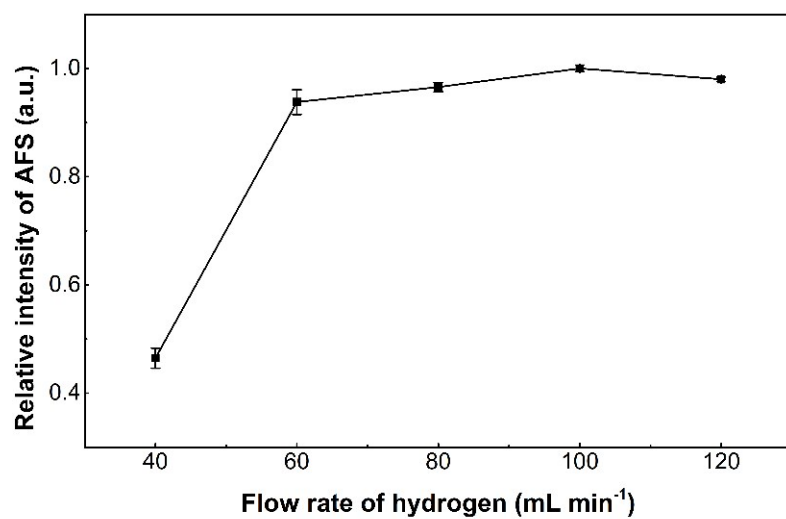

**Fig. S3** Influence of H<sub>2</sub> flow rate.

Experimental details: Te(IV), 50 μg L<sup>-1</sup>; and Co<sup>2+</sup>, 1 mg L<sup>-1</sup>.
